# Supplementary material
Source: MDPI journal article supplement (https://www.mdpi.com/2673-8430/3/3/30)
Supplement: s1 [file s1]

Table S2. Weighted Means and standard deviations (in brackets) for the wellbeing, work-related quality of life (WRQoL) by occupation and across phases.

| Variables | Occupation    |               |               |               |               |
|-----------|---------------|---------------|---------------|---------------|---------------|
|           | Nursing       | Midwifery     | AHP           | Social Care   | Social Worker |
| WRQoL     |               |               |               |               |               |
| Phase 1   | 76.65 (18.75) | 75.55 (13.88) | 80.12 (13.19) | 77.29 (16.22) | 78.90 (14.57) |
| Phase 2   | 73.06 (14.91) | 73.42 (17.55) | 77.51 (15.27) | 75.34 (16.17) | 75.93 (15.07) |
| Phase 3   | 73.56 (15.79) | 68.91 (14.91) | 75.39 (16.47) | 72.37 (15.97) | 71.34 (16.07) |
| Phase 4   | 73.54 (16.04) | 67.75 (15.63) | 74.74 (15.68) | 70.57 (1.83)  | 70.68 (16.23) |
| Phase 5   | 72.62 (17.54) | 65.86 (18.38) | 76.07 (16.79) | 72.27 (15.82) | 72.05 (16.23) |
| Phase 6   | 72.63 (17.85) | 67.00 (16.10) | 74.74 (15.91) | 68.76 (15.82) | 70.93 (16.02) |
| Wellbeing |               |               |               |               |               |
| Phase 1   | 21.79 (4.07)  | 21.35 (3.71)  | 21.28 (3.18)  | 21.30 (3.79)  | 21.40 (3.40)  |
| Phase 2   | 20.74 (3.43)  | 20.84 (3.99)  | 20.88 (3.37)  | 20.20 (3.53)  | 20.32 (3.20)  |
| Phase 3   | 20.80 (3.68)  | 19.84 (3.68)  | 20.80 (3.86)  | 20.33 (3.74)  | 20.36 (3.51)  |
| Phase 4   | 20.91 (3.49)  | 20.13 (3.74)  | 21.11 (3.62)  | 20.16 (3.45)  | 20.29 (3.52)  |
| Phase 5   | 20.91 (4.19)  | 19.67 (2.90)  | 21.43 (3.81)  | 20.64 (3.33)  | 20.76 (3.37)  |
| Phase 6   | 20.90 (3.73)  | 19.58 (3.27)  | 21.14 (3.48)  | 19.79 (3.36)  | 20.31 (3.34)  |

Table S3. Weighted Means and standard deviations (in brackets) for wellbeing, work-related quality of life (WRQoL), coping strategies and burnout across study phases.

| Variable                             | Phase 1       | Phase 2       | Phase 3       | Phase 4       | Phase 5       | Phase 6       | Phase Comparison |
|--------------------------------------|---------------|---------------|---------------|---------------|---------------|---------------|------------------|
|                                      | M (SD)        |               |               |               |               |               | <i>p</i> -Value  |
| Wellbeing                            | 21.36 (3.57)  | 20.43 (3.40)  | 20.47 (3.68)  | 20.65 (3.57)  | 20.79 (3.55)  | 20.32 (3.46)  | <.001            |
| Quality of working life              | 78.16 (15.29) | 75.66 (15.57) | 72.54 (16.04) | 72.38 (16.49) | 72.61 (16.58) | 70.91 (16.34) | <.001            |
| Coping strategies                    |               |               |               |               |               |               |                  |
| Active coping                        | 6.08 (1.61)   | 5.01 (1.68)   | 5.38 (1.76)   | 5.34 (1.70)   | 5.28 (1.74)   | 5.19 (1.75)   | <.001            |
| Planning                             | 5.84 (1.75)   | 5.48 (1.82)   | 5.43 (1.84)   | 5.37 (1.81)   | 5.34 (1.84)   | 5.24 (1.89)   | <.001            |
| Positive reframing                   | 5.96 (1.62)   | 5.64 (1.67)   | 5.52 (1.70)   | 5.38 (1.70)   | 5.39 (1.73)   | 5.16 (1.73)   | <.001            |
| Acceptance                           | 6.49 (1.43)   | 6.18 (1.52)   | 6.06 (1.54)   | 5.98 (1.53)   | 6.02 (1.57)   | 5.77 (1.73)   | <.001            |
| Use of emotional support             | 5.02 (1.77)   | 4.91 (1.79)   | 4.79 (1.77)   | 4.78 (1.73)   | 4.60 (1.79)   | 4.54 (1.80)   | <.001            |
| Use of instrumental support          | 4.47 (1.73)   | 4.50 (1.76)   | 4.37 (1.75)   | 4.42 (1.75)   | 4.33 (1.75)   | 4.27 (1.75)   | <.001            |
| Venting                              | 3.52 (1.40)   | 4.22 (1.62)   | 4.26 (1.74)   | 4.26 (1.67)   | 4.20 (1.73)   | 4.21 (1.72)   | <.001            |
| Substance use                        | 2.77 (1.39)   | 2.89 (1.49)   | 2.95 (1.58)   | 2.79 (1.44)   | 2.82 (1.44)   | 2.85 (1.50)   | .004             |
| Behavioural disengagement            | 2.62 (1.18)   | 2.96 (1.39)   | 3.04 (1.46)   | 3.91 (1.44)   | 3.05 (1.47)   | 3.12 (1.51)   | <.001            |
| Self-blame                           | 3.27 (1.60)   | 3.92 (1.84)   | 4.18 (1.92)   | 4.09 (1.87)   | 4.04 (1.90)   | 4.10 (1.94)   | <.001            |
| Family–work segmentation             | 5.05 (.091)   | 5.06 (.92)    | 5.10 (.93)    | 5.03 (.93)    | 5.10 (.92)    | 5.08 (.87)    | .044             |
| Work–family segmentation             | 4.71 (1.06)   | 4.60 (1.10)   | 4.58 (1.15)   | 4.59 (1.14)   | 4.59 (1.15)   | 4.54 (1.16)   | <.001            |
| Working to improve skills/efficiency | 4.33 (1.05)   | 4.22 (1.10)   | 4.20 (1.11)   | 4.20 (1.08)   | 4.14 (1.15)   | 4.08 (1.14)   | <.001            |
| Recreation and relaxation            | 3.76 (1.22)   | 3.59 (1.25)   | 3.52 (1.26)   | 3.48 (1.26)   | 3.40 (1.27)   | 3.41 (1.26)   | <.001            |
| Exercise                             | 3.93 (1.35)   | 3.71 (1.41)   | 3.74 (1.39)   | 3.79 (1.43)   | 3.69 (1.45)   | 3.47 (1.46)   | <.001            |

## Multivariate Analysis

Data were not normally distributed and therefore Kruskal–Wallis H tests were used to compare the scores on wellbeing, work-related quality of life, and the domains of coping. The weighted results showed that wellbeing significantly differed across the occupation groups in Phases 1 ( $p=0.08$ ) and in Phases 2, 3, 4, 5 and 6 ( $p < 0.01$ ). Overall WRQoL significantly differed across the occupation groups in Phase 1 ( $p=0.02$ ), Phase 2 ( $p=0.03$ ) and Phases 3, 4, 5 and 6 ( $p < 0.01$ ). Within the occupational groups examined significant differences were evident. In the results showed that WRQoL scores, within for AHPs ( $\chi^2(5) = 29.96, p < 0.001$ ), midwives ( $\chi^2(5) = 29.94, p < 0.001$ ), social care workers ( $\chi^2(5) = 111.89, p < 0.001$ ) and social workers ( $\chi^2(5) = 162.76, p < 0.001$ ), significantly changed across the Phases. Across the phases there was no significant difference in scores for nurses ( $\chi^2(5) = 8.13, p = .149$ ). Similar results were found for wellbeing scores, for midwives ( $\chi^2(5) = 18.17, p < 0.001$ ), social care workers ( $\chi^2(5) = 75.00, p < 0.001$ ) and social workers ( $\chi^2(5) = 78.70, p < 0.001$ ). While no significant differences were found in across the nursing ( $\chi^2(5) = 8.72, p = .121$ ), or AHP ( $\chi^2(5) = 6.53, p = .258$ ) occupations. In comparing the occupations to each other results showed no significant difference between the occupation in terms of wellbeing scores in Phase 1, ( $\chi^2(5) = 2.61, p = .625$ ). All other phases showed significant differences across the occupations, Phase 2 ( $\chi^2(5) = 8.72, p < .001$ ), Phase 3 ( $\chi^2(5) = 15.98, p = .003$ ), Phase 4 ( $\chi^2(5) = 14.42, p = .006$ ), Phase 5 ( $\chi^2(5) = 14.78, p = .005$ ) and Phase 6 ( $\chi^2(5) = 23.92, p < .001$ ),

The results showed that wellbeing, ( $\chi^2(5) = 142.21, p < 0.001$ ) significantly declined across the Phases. Phase 1 respondents reported the highest wellbeing (21.36), compared to Phase 2 (20.43) however wellbeing rose again Phase 3 (20.20.47), in Phase 4 (20.66) and Phase 5 (20.79) while decreasing in Phase 6 (20.32) which was the lowest reported. Dunn's pairwise comparison (adjusted using Bonferroni correction) revealed a significant difference between wellbeing in Phase 1 and 2, ( $p < 0.001$ ), Phase 1 and 3 ( $p < 0.001$ ), Phase 1 and 4 ( $p < 0.001$ ), Phase 1 and 5 ( $p < 0.001$ ), Phase 1 and 6 ( $p < 0.001$ ). There were also significant difference between Phase 2 and 4 ( $p = .014$ ), Phase 2 and 5 ( $p < .001$ ), Phase 3 and 5 ( $p = .004$ ), Phase 6 and 4 ( $p = .006$ ), and Phase 6 and 5 ( $p < .001$ ).

Overall WRQoL ( $\chi^2(5) = 293.14, p < 0.001$ ) significantly differed across the six phases. Across the first three phases there was a decrease in scores with a mean rank WRQoL score of 78.09 for Phase 1, 72.53 for Phase 2, 71.98 for Phase 3. While Phase 4 showed a slight increase with a score of 75.65, before continuing

to decrease with a score 73.38 in Phase 5, 71.99 in Phase 6. Dunn's pairwise comparison revealed a significant difference in overall WRQoL between all individual phases ( $p < 0.05$ ) except between Phases 3 and 4 ( $p = 0.914$ ), Phases 3 and 5 ( $p = 0.950$ ), Phases 4 and 5 ( $p = 0.878$ ), which showed no significant difference.

Family work segmentation ( $\chi^2(5) = 11.41, p = 0.044$ ), Work-family segmentation ( $\chi^2(5) = 24.38, p < 0.001$ ), Working to improve skills/efficiency ( $\chi^2(5) = 45.06, p < 0.001$ ), recreation and relaxation ( $\chi^2(5) = 114.06, p < 0.001$ ) and exercise ( $\chi^2(5) = 94.91, p < 0.001$ ) all significantly changed across the phases. Active coping ( $\chi^2(5) = 370.92, p < 0.001$ ), Planning ( $\chi^2(5) = 131.08, p < 0.001$ ), Positive reframing ( $\chi^2(5) = 240.07, p < 0.001$ ), Acceptance ( $\chi^2(5) = 232.79, p < 0.001$ ), Emotional Support ( $\chi^2(5) = 91.28, p < 0.001$ ), Instrumental Support ( $\chi^2(5) = 25.22, p < 0.001$ ), Venting ( $\chi^2(5) = 361.45, p < 0.001$ ), Substance use ( $\chi^2(5) = 17.33, p = 0.004$ ), Behavioural Disengagement ( $\chi^2(5) = 195.40, p < 0.001$ ) and Self-blame ( $\chi^2(5) = 407.99, p < 0.001$ ) all showed significant differences between the six phases. As shown in Table 2 a majority of the positive coping strategies (active coping, positive reframing, acceptance, use of emotional support, instrumental support) showed decreases over the first three phases while increasing in Phase 4 before decreasing again across Phase 5. The negative more avoidant strategies (venting, substance use, behavioural disengagement and self-blame) initially showed increases between Phases 1 to 3, while decreasing in Phases 4 before showing signs of increasing in Phases 5 and 6. While there are significant differences, the results show fluctuations between increases and decreases in the use of the positive or negative coping strategies.
